# Supplementary material for: Multispecies Bacterial Bio-Input: Tracking and Plant-Growth-Promoting Effect on Lettuce var. sagess
Source: MDPI journal article supplement (doi:10.3390/plants12040736), 2023-02-07
Supplement: s1 [file s1]

## Supplementary Materials

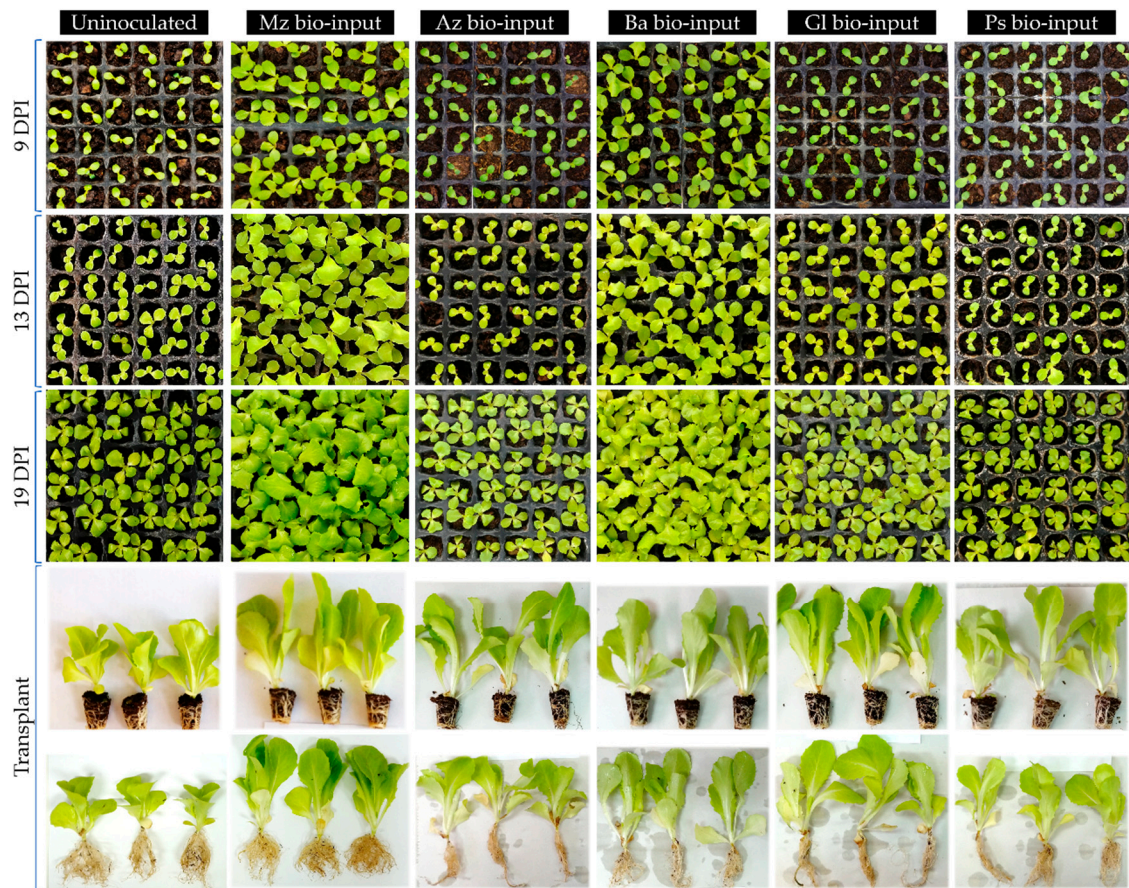

**Figure S1.** Photographs of lettuce seedlings grown in controlled conditions several days post-inoculation (DPI).
